# Supplementary material for: Rapid synthesis of nanoscale terbium-based metal–organic frameworks by a combined ultrasound-vapour phase diffusion method for highly selective sensing of picric acid
Source: Royal Society of Chemistry journal article supplement (doi:10.1039/c3ta11517h), 2013-01-01
Supplement: c3ta11517h.pdf [file c3ta11517h.pdf]

Supplementary Information for

**Rapid synthesis of nanoscale terbium-based metal-organic frameworks by an  
ultrasound-vapour phase diffusion combined method for highly selective sensing of  
picric acid**

*Juan-Ding Xiao, Ling-Guang Qiu\*, Fei Ke, Geng-Sheng Xu, Yi-Ming Wang  
and Xia Jiang*

\* E-mail address: [lgqiu@ahu.edu.cn](mailto:lgqiu@ahu.edu.cn)

**Table S1**

Yields of Tb(1,3,5-BTC) crystals prepared by ultrasonic synthesis and  
ultrasonic-vapour phase diffusion methods

| Synthetic methods           | Reaction time | Temperature (°C) | Yields(based on Tb) | Product                                                                                       |
|-----------------------------|---------------|------------------|---------------------|-----------------------------------------------------------------------------------------------|
| <i>Ultrasound diffusion</i> | 2 min         | 60               | 65.7%               | [Tb(1,3,5-btc)] <sub>n</sub>                                                                  |
|                             | 10 min        | 60               | 63.5%               | [Tb(1,3,5-btc)] <sub>n</sub>                                                                  |
|                             | 20 min        | 60               | 64.0%               | [Tb(1,3,5-btc)] <sub>n</sub>                                                                  |
|                             | 30 min        | 60               | 59.1%               | [Tb(1,3,5-btc)] <sub>n</sub>                                                                  |
| <i>ultrasound</i>           | 30 min        | 60               | 0.6%                | [Tb(1,3,5-btc)] <sub>n</sub>                                                                  |
|                             | 60 min        | 60               | 1.7%                | [Tb(1,3,5-btc)] <sub>n</sub>                                                                  |
|                             | 90 min        | 60               | 7.2%                | [Tb(1,3,5-btc)] <sub>n</sub>                                                                  |
|                             | 140 min       | 60               | 14.2%               | [Tb(1,3,5-btc)] <sub>n</sub> and [Tb(1,3,5-btc)(H <sub>2</sub> O) <sub>6</sub> ] <sub>n</sub> |

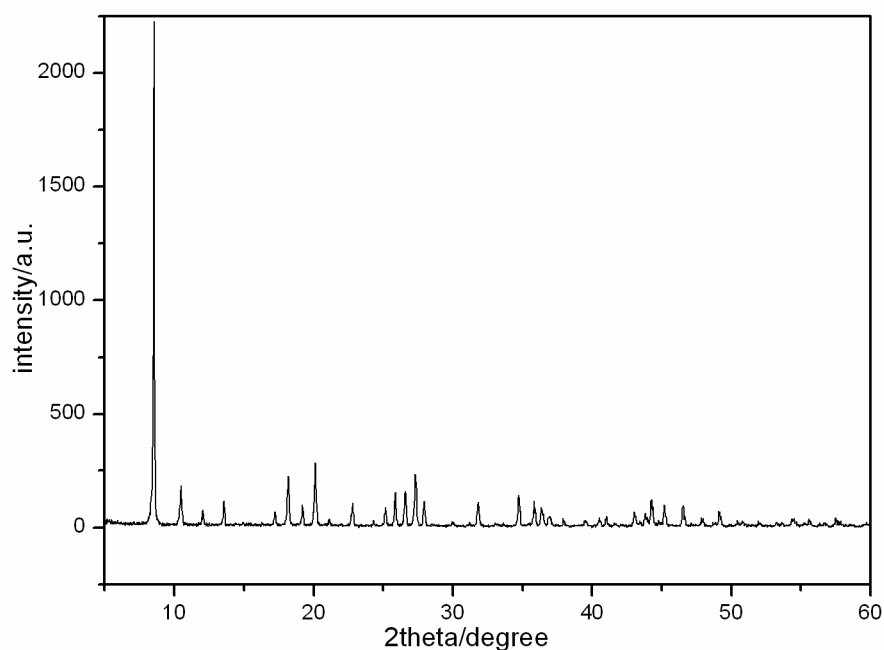

**Fig. S1** PXRD patterns of the as-synthesized Tb(1,3,5-btc) by conventional solvothermal heating method at 80 °C for 24h.

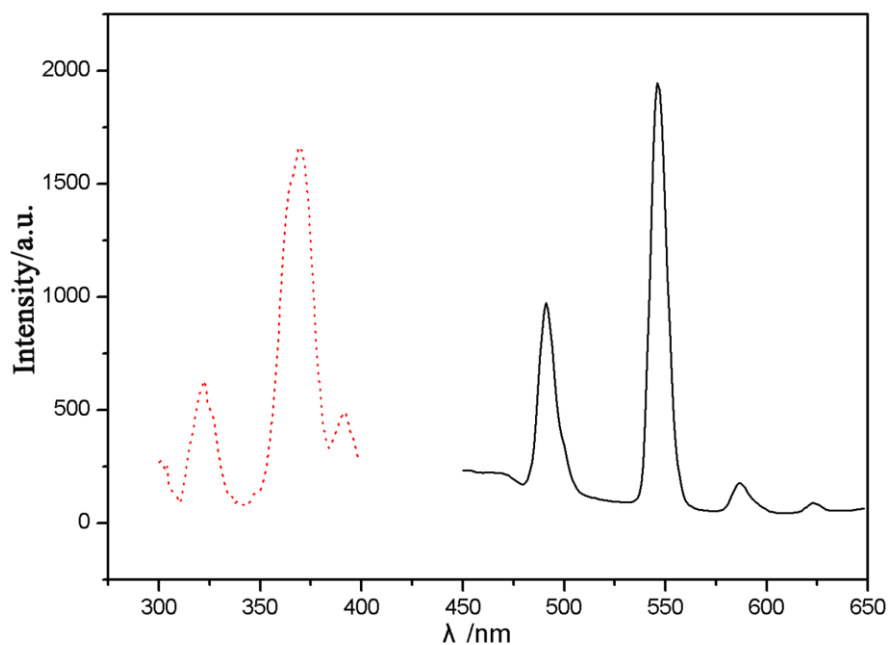

**Fig. S2** Emission and excitation spectra of solid state [Tb(1,3,5-BTC)]<sub>n</sub>. The excitation wavelength is 324 nm and the emission wavelengths are 491, 546, and 589 nm.

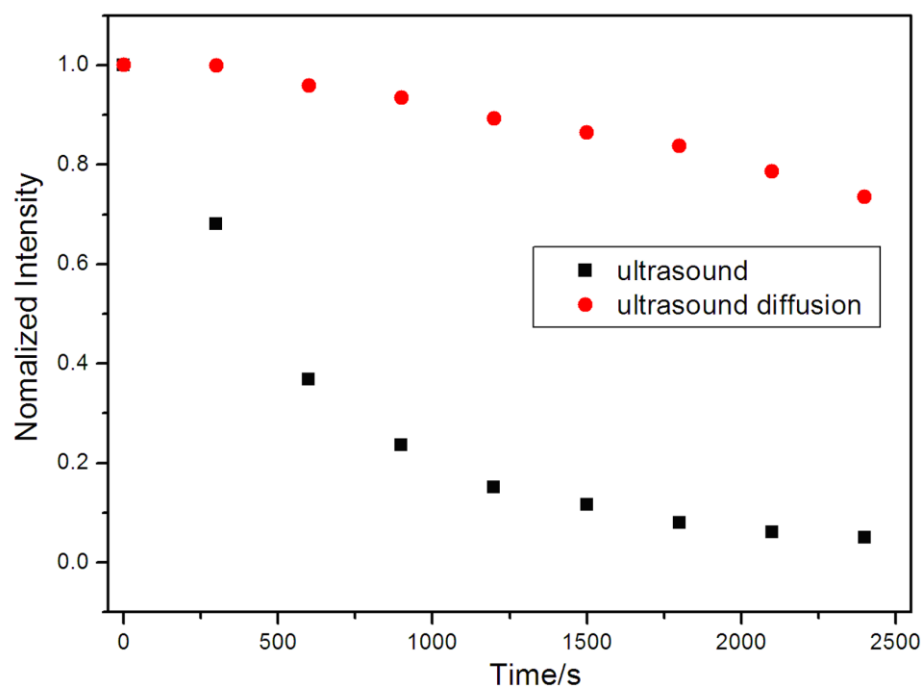

**Fig. S3** Variation of luminescence intensity of suspension of the as-prepared [Tb(1,3,5-btc)]n nano- and microcrystals in ethanol solution with the standing time, clearly revealing better luminescence stability of [Tb(1,3,5-btc)]n nanocrystal suspension in solution. The excitation wavelength is 324 nm.

Table S2

Summary of the selectivity of different sensor systems with picric acid reported previously and investigated in the present work.

“√”— sensitive; “×”— insensitive; “—” —not detected

| Fluorophores                     | structures                                                                                                                                                                                                                                                                                                                      | NB | 2-NT | 4-NT | 2,4-DNT | 2,6-DNT | PA | Ref. |
|----------------------------------|---------------------------------------------------------------------------------------------------------------------------------------------------------------------------------------------------------------------------------------------------------------------------------------------------------------------------------|----|------|------|---------|---------|----|------|
| Hexaphenylsilole film            | 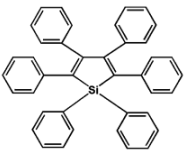                                                                                                                                                                                                                                               | ×  | ×    | ×    | ×       | ×       | √  | [1]  |
| Organic conjugated polymers 1-12 | 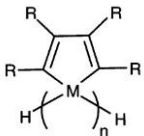<br>1; M = Si<br>2; M = Ge                                                                                                                                                                                                                     | √  | —    | —    | √       | √       | √  | [47] |
|                                  |                                                                                                                                                                                                                                                                                                                                 | ×  | —    | —    | √       | √       | √  |      |
|                                  | 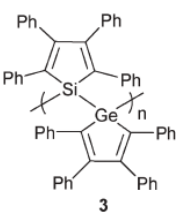<br>3                                                                                                                                                                                                                                        | √  | —    | —    | √       | √       | √  |      |
|                                  | 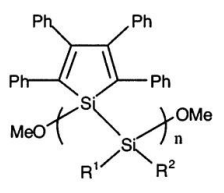<br>4; R <sup>1</sup> = H, R <sup>2</sup> = Me<br>5; R <sup>1</sup> = H, R <sup>2</sup> = Ph<br>6; R <sup>1</sup> = H, R <sup>2</sup> = Me or Ph<br>7; R <sup>1</sup> = Ph, R <sup>2</sup> = Ph<br>8; R <sup>1</sup> = H, R <sup>2</sup> = H | √  | —    | —    | √       | √       | √  |      |
|                                  |                                                                                                                                                                                                                                                                                                                                 | √  | —    | —    | √       | √       | √  |      |
|                                  |                                                                                                                                                                                                                                                                                                                                 | √  | —    | —    | √       | √       | √  |      |
|                                  |                                                                                                                                                                                                                                                                                                                                 | √  | —    | —    | √       | √       | √  |      |
|                                  |                                                                                                                                                                                                                                                                                                                                 | √  | —    | —    | √       | √       | √  |      |
|                                  |                                                                                                                                                                                                                                                                                                                                 | √  | —    | —    | √       | √       | √  |      |
|                                  | 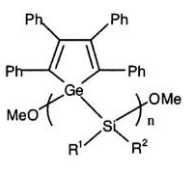<br>9; R <sup>1</sup> = H, R <sup>2</sup> = Me<br>10; R <sup>1</sup> = H, R <sup>2</sup> = Ph<br>11; R <sup>1</sup> = H, R <sup>2</sup> = Me or Ph<br>12; R <sup>1</sup> = Ph, R <sup>2</sup> = Ph                                           | √  | —    | —    | √       | √       | √  |      |
|                                  |                                                                                                                                                                                                                                                                                                                                 | √  | —    | —    | √       | √       | √  |      |
|                                  |                                                                                                                                                                                                                                                                                                                                 | √  | —    | —    | √       | √       | √  |      |
|                                  |                                                                                                                                                                                                                                                                                                                                 | √  | —    | —    | √       | √       | √  |      |

|                                 |                                                                                     |   |   |   |   |   |   |      |
|---------------------------------|-------------------------------------------------------------------------------------|---|---|---|---|---|---|------|
| Fluoroalkylated polysilane Film | 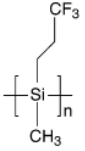   | — | — | — | ✓ | ✓ | ✓ | [46] |
| Phosphole oxide                 | 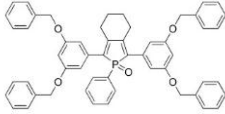   | — | — | — | ✓ | — | ✓ | [48] |
| Poly(silylene-vinylene)         | 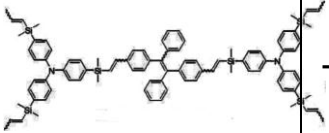   | — | — | — | — | — | ✓ | [49] |
| Organic conjugated polymers     | 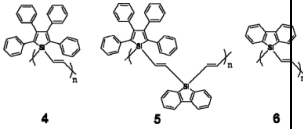   | — | — | — | ✓ | — | ✓ | [51] |
| Pyrene moieties                 | 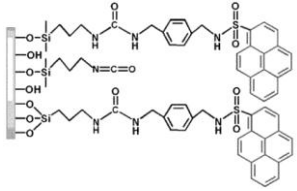  | ✓ | — | — | ✓ | — | ✓ | [52] |
| Organic fluorophores 1-5        | 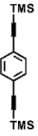 | ✓ | — | ✓ | — | — | ✓ | [53] |
|                                 | 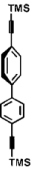 | × | — | ✓ | — | — | ✓ |      |
|                                 | 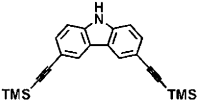 | ✓ | — | ✓ | — | — | ✓ |      |
|                                 | 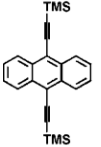 | ✓ | — | ✓ | — | — | ✓ |      |
|                                 | 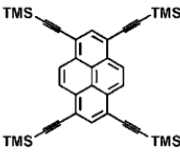 | ✓ | — | × | — | — | ✓ |      |

|                                                                                          |                                                                                     |   |   |   |   |   |   |      |
|------------------------------------------------------------------------------------------|-------------------------------------------------------------------------------------|---|---|---|---|---|---|------|
| SNW-1 nanoparticles                                                                      | 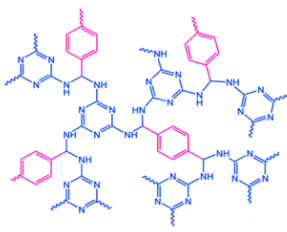   | ✓ | — | ✓ | ✓ | — | ✓ | [54] |
| Terthiophene                                                                             | 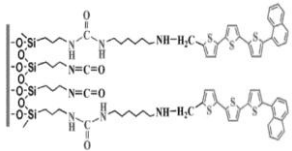   | × | — | — | × | — | ✓ | [55] |
| An anthracene /porphyrin dimer                                                           | 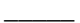   | — | — | — | — | — | ✓ | [57] |
| [Zn <sub>2</sub> (oba) <sub>2</sub> (bpy)]                                               | 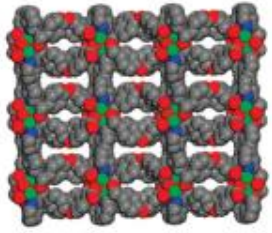   | ✓ | ✓ | — | × | — | — | [58] |
| [Zn <sub>2</sub> (bpdc) <sub>2</sub> (bpee)]                                             | 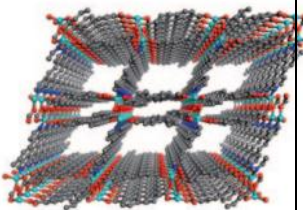 | × | — | — | ✓ | — | — | [59] |
| [Eu <sub>2</sub> (BDC) <sub>3</sub> (H <sub>2</sub> O)·(H <sub>2</sub> O) <sub>2</sub> ] | 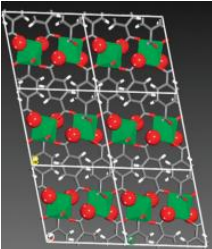 | ✓ | — | ✓ | — | — | — | [60] |
| [Zn <sub>4</sub> O(L) <sub>2</sub> ·(H <sub>2</sub> O) <sub>3</sub> ]                    | 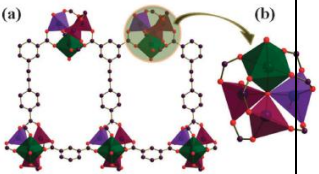 | ✓ | ✓ | — | ✓ | ✓ | ✓ | [61] |

|                                                  |                                                                                                                                                                    |   |   |   |   |   |   |           |
|--------------------------------------------------|--------------------------------------------------------------------------------------------------------------------------------------------------------------------|---|---|---|---|---|---|-----------|
| Hyperbranched polytriazoles                      | 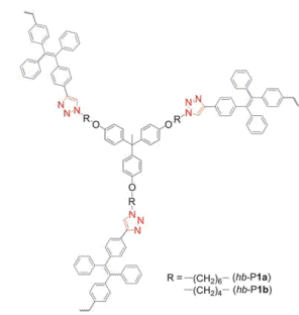 <p>R = <math>-(CH_2)_6-</math> (hb-P1a)<br/><math>-(CH_2)_4-</math> (hb-P1b)</p> | — | — | — | — | — | ✓ | [62]      |
| Tetrakis(4-methoxyphenyl) porphyrin (TMOPP) film | —                                                                                                                                                                  | — | — | — | ✓ | — | ✗ | [63]      |
| TPE-CP                                           | 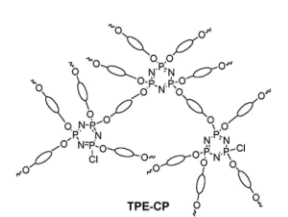 <p>TPE-CP</p>                                                                    | — | — | — | — | — | ✓ | [64]      |
| [Tb(1,3,5-BTC)] <sub>n</sub>                     | 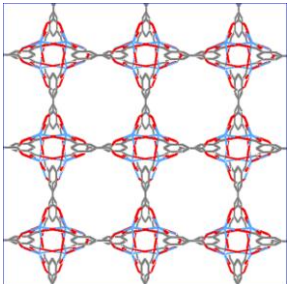                                                                                 | ✗ | ✗ | ✗ | ✗ | ✗ | ✓ | this work |

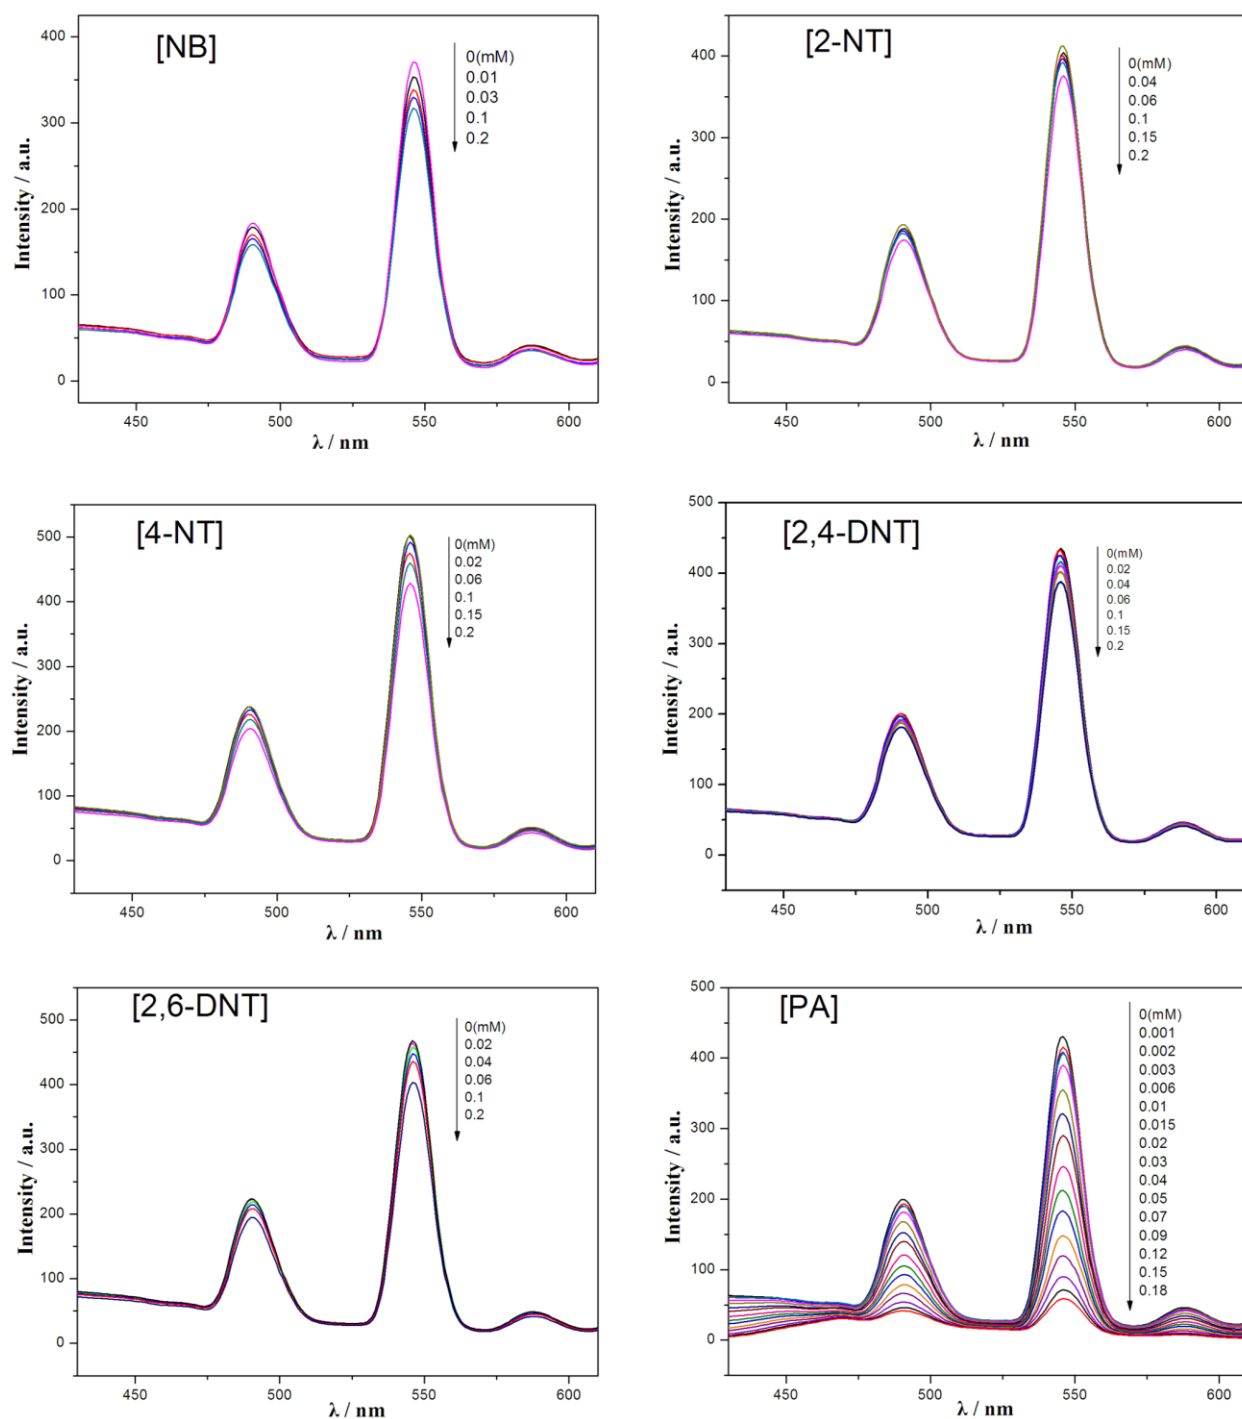

**Fig. S4** Luminescence quenching of [Tb(1,3,5-BTC)]<sub>n</sub> nanocrystals with nitroaromatics (NB, NTs, DNTs, and PA) in aqueous solution.

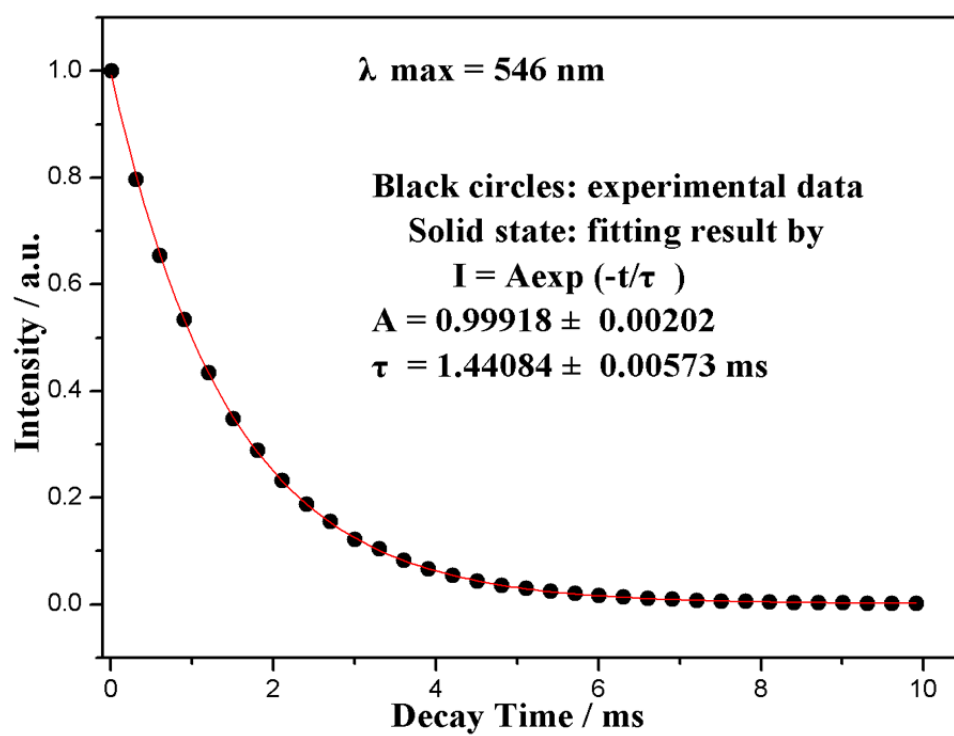

**Fig. S5** The decay curves for the luminescence of  $[\text{Tb}(1,3,5\text{-BTC})]_n$  nanocrystals.
